# Supplementary material for: Determining Optimal Parameters for Expediting Policies
Source: Atypon-hosted journal article supplement (doi:10.1287/msom.2014.0506), 2014-12-11
Supplement: msom.2014.0506-sm.pdf [file msom.2014.0506-sm.pdf]

## Online Supplement to Determining Optimal Parameters of Expediting Policies

### A. Proofs

*Proof of Proposition 1.* If one or more of the previous  $l$  orders have been expedited in period  $t$ , then  $\sum_{i=1}^l o_{t,i}^+ = K$ . Therefore, if  $\sum_{i=1}^l o_{t,i}^+ < K$ , then none of the previous  $l$  orders has been expedited in period  $t$ . The newest outstanding order,  $o_{t,1}^+$ , corresponds to the demand of the previous period,  $d_{t-1}$ , and all other outstanding orders,  $o_{t,2}^+, \dots, o_{t,l}^+$ , correspond to their respective outstanding order of the previous period,  $o_{t-1,1}^+, \dots, o_{t-1,l-1}^+$ :

$$o_{t,i}^+ = \begin{cases} d_{t-1}, & \text{for } i = 1, \\ o_{t-1,i-1}^+, & \text{for } i = 2 \dots l. \end{cases}$$

It remains to be proven that  $o_{t,i}^+ = d_{t-i}$  for  $i = 2 \dots l$ . Note that

$$\sum_{i=1}^{l-1} o_{t-1,i}^+ = \sum_{i=2}^l o_{t-1,i-1}^+ = \sum_{i=2}^l o_{t,i}^+ \leq \sum_{i=1}^l o_{t,i}^+ < K,$$

i.e., the total number of units outstanding from the previous  $l-1$  orders after the expediting decision in period  $t-1$  is below  $K$ . Therefore, along the same line of arguments as above, we obtain

$$o_{t,i}^+ = o_{t-1,i-1}^+ = \begin{cases} d_{t-2}, & \text{for } i = 2, \\ o_{t-2,i-2}^+, & \text{for } i = 3 \dots l, \end{cases}$$

and  $\sum_{i=1}^{l-2} o_{t-2,i}^+ < K$ . Iteratively, we can show that we obtain  $o_{t,i}^+ = d_{t-i}$  for  $i = 1 \dots l$ .  $\square$

*Proof of Proposition 2.* To prove that  $S^*(K) = (F_O^{L_e, L_n})^{-1}(b/(b+h))$  is increasing in  $K$ , we prove that  $F_O^{L_e, L_n}(k)$  is decreasing in  $K$ .  $F_O^{L_e, L_n}(\cdot)$  can be written as (see Equation (11))

$$F_O^{L_e, L_n}(k) = \sum_{j=0}^k f_O^{L_e, L_n}(j) = \sum_{j=0}^k \sum_{i=0}^j f_D^{L_n+1}(i) f_{O_+}^{L_e}(j-i) = \dots = \sum_{i=0}^k f_D^{L_n+1}(i) F_{O_+}^{L_e}(k-i), \quad (18)$$

where  $F_{O_+}^{L_e}(\cdot)$  can be determined from Equation (3),

$$F_{O_+}^{L_e}(k) = \begin{cases} F_D^{L_e}(k), & \text{for } k < K, \\ 1, & \text{for } k \geq K. \end{cases} \quad (19)$$

From Equation (18), we obtain the first-order finite difference of  $F_O^{L_e, L_n}(\cdot)$  with respect to  $K$ ,

$$\Delta_K F_O^{L_e, L_n}(k) = \dots = \sum_{i=0}^k f_D^{L_n+1}(i) \Delta_K F_{O_+}^{L_e}(k-i)$$

and from Equation (19), we obtain the first-order finite difference of  $F_{O_+}^{L_e}(\cdot)$  with respect to  $K$ ,

$$\Delta_K F_{O_+}^{L_e}(k) = \begin{cases} F_D^{L_e}(K) - 1, & \text{for } k = K, \\ 0, & \text{otherwise.} \end{cases}$$

Clearly  $\Delta_K F_{O_+}^{L_e}(k) \leq 0$ , which implies that  $\Delta_K F_O^{L_e, L_n}(k) \leq 0$ . Thus,  $F_O^{L_e, L_n}(k)$  is decreasing in  $K$  and  $S^*(K)$  is increasing in  $K$ .  $\square$

*Proof of Proposition 3.* To prove quasi-convexity of  $Z^s(S, K)$  in  $K$  for a given  $S$ , we show that  $Z^s(S, K)$  is decreasing in  $K$  for  $K < K^*(S)$  and increasing in  $K$  for  $K \geq K^*(S)$  by showing that the first-order finite difference  $\Delta_K Z^s(S, K)$  (Equation (16)) is negative for  $K < K^*(S)$  and positive for  $K \geq K^*(S)$ .

Note that the first term of Equation (16),  $1 - F_D^{L_e}(K)$ , is always positive and it suffices to show that the second term of Equation (16),  $b - c_v - (b+h)F_D^{L_n+1}(S-K-1)$ , is negative for  $K < K^*(S)$  and positive for  $K \geq K^*(S)$ .

$K < K^*(S)$ : From Equation (17), we know that  $K^*(S)$  is the largest integer satisfying  $F_D^{L_n+1}(S-K^*(S)) \geq (b-c_v)/(b+h)$ . Thus,  $F_D^{L_n+1}(S-K) \geq (b-c_v)/(b+h)$  for  $K \leq K^*(S)$  and we obtain  $b - c_v - (b+h)F_D^{L_n+1}(S-K-1) \leq 0$  for  $K < K^*(S)$ .

$K \geq K^*(S)$ : Because  $K^*(S)$  is the largest integer satisfying  $F_D^{L_n+1}(S-K^*(S)) \geq (b-c_v)/(b+h)$ , we know that  $F_D^{L_n+1}(S-K) < (b-c_v)/(b+h)$  for  $K \geq K^*(S)+1$ . Thus, we obtain  $b - c_v - (b+h)F_D^{L_n+1}(S-K-1) > 0$  for  $K \geq K^*(S)$ .  $\square$

*Proof of Proposition 4.* Because  $K^*(S) = S - (F_D^{L_n+1})^{-1}\left(\frac{b-c}{b+h}\right)$ , we obtain  $K^*(S+k) = K^*(S) + k$ , i.e., if  $S$  increases, then  $K^*(S)$  increases by the same quantity. Therefore, we can show that  $Z^s(S, K^*(S))$  is convex in  $S$  by showing that  $Z^s(S, K)$  is convex in  $S$  and  $K$ , given  $K = K^*(S)$ .

The second-order finite difference function of  $Z^s(S, K)$  with respect to  $S$  and  $K$  is

$$\Delta_{S,K}^2 Z^s(S, K) = (b+h) \left[ \sum_{j=0}^{K-1} f_D^{L_e}(j) f_D^{L_n+1}(S-j) + f_D^{L_e}(K) F_D^{L_n+1}(S-K) \right] - (b-c_v) f_D^{L_e}(K).$$

Setting  $K = K^*(S)$ , we obtain

$$\begin{aligned} \Delta_{S,K}^2 Z^s(S, K^*(S)) &= (b+h) \sum_{j=0}^{K^*(S)-1} f_D^{L_e}(j) f_D^{L_n+1}(S-j) \\ &\quad + (b+h) f_D^{L_e}(K^*(S)) F_D^{L_n+1}(S-K^*(S)) - (b-c_v) f_D^{L_e}(K^*(S)). \end{aligned}$$

Because  $F_D^{L_n+1}(S-K^*(S)) = F_D^{L_n+1}\left((F_D^{L_n+1})^{-1}\left(\frac{b-c}{b+h}\right)\right) \geq \frac{b-c}{b+h}$ , we can replace  $F_D^{L_n+1}(S-K^*(S))$  by  $\frac{b-c}{b+h}$  to obtain the lower bound

$$\begin{aligned} \Delta_{S,K}^2 Z^s(S, K^*(S)) &\geq (b+h) \sum_{j=0}^{K^*(S)-1} f_D^{L_e}(j) f_D^{L_n+1}(S-j) \\ &\quad + (b+h) f_D^{L_e}(K^*(S)) \frac{b-c}{b+h} - (b-c_v) f_D^{L_e}(K^*(S)) \\ &= (b+h) \sum_{j=0}^{K^*(S)-1} f_D^{L_e}(j) f_D^{L_n+1}(S-j) \\ &\geq 0, \end{aligned}$$

which proves that  $Z^s(S, K^*(S))$  is convex in  $S$ .  $\square$

*Proof of Proposition 5.* The proof of Proposition 5 uses the following Lemma:

LEMMA 1. *The expected number of orders from which units are expedited,  $\mathbb{E}C^o(K)$ , has the following property:*

$$\Delta_K \mathbb{E}C^o(K) \geq F_D^{L_e}(K) - 1.$$

*Proof of Lemma 1.* Before we derive the lower bound on  $\Delta_K \mathbb{E}C^o(K) = -\sum_{l=1}^{L_e} \Delta_K P(e_l = 0)$ , we calculate an upper bound on  $\Delta_K P(e_l = 0)$ , the probability that no units from the order placed  $l$  periods before are expedited with respect to the expediting level  $K$ . For  $l \geq 3$ , we have

$$\begin{aligned} \Delta_K P(e_l = 0) &= f_D^l(K+1) - f_D(0)f_D^{l-1}(K+1) - f_D(0)[f_D^{l-1}(K+1) - f_D(0)f_D^{l-2}(K+1)] \\ &\quad - [1 - f_D(0)][1 - f_D(0)]f_D^{l-2}(K). \end{aligned}$$

Because  $f_D^{l-1}(K+1) - f_D(0)f_D^{l-2}(K+1) = \sum_{k=0}^K f_D^{l-2}(k)f_D(K+1-k) \geq 0$ , we can simplify this expression to

$$\Delta_K P(e_l = 0) \leq f_D^l(K+1) - f_D(0)f_D^{l-1}(K+1).$$

Similarly, we obtain  $\Delta_K P(e_2 = 0) \leq f_D^2(K+1) - f_D(0)f_D^1(K+1)$  for  $l=2$  and  $\Delta_K P(e_1 = 0) \leq f_D^1(K+1)$  for  $l=1$ . Therefore,

$$\Delta_K \mathbb{E}C^o(K) \geq -f_D^{L_e}(K+1) + \sum_{l=2}^{L_e} [f_D(0)f_D^{l-1}(K+1) - f_D^l(K+1)].$$

After decomposing the sum, we shift the index of the first sum by 1 and re-compose the sums. This results in

$$\Delta_K \mathbb{E}C^o(K) \geq -f_D^{L_e}(K+1) + \sum_{l=1}^{L_e-1} [f_D(0) - 1] f_D^l(K+1).$$

Using

$$\begin{aligned} [f_D(0) - 1] f_D^l(K+1) &= F_D^{l+1}(K+1) - F_D^{l+1}(K+1) + f_D(0)f_D^l(K+1) - f_D^l(K+1) \\ &= F_D^{l+1}(K+1) - \sum_{k=0}^K f_D^l(k)F_D(K+1-k) - f_D^l(K+1) \\ &\geq F_D^{l+1}(K+1) - \sum_{k=0}^K f_D^l(k) - f_D^l(K+1) \\ &= F_D^{l+1}(K+1) - F_D^l(K+1), \end{aligned}$$

we obtain

$$\Delta_K \mathbb{E}C^o(K) \geq -f_D^{L_e}(K+1) + \sum_{l=1}^{L_e-1} [F_D^{l+1}(K+1) - F_D^l(K+1)].$$

After decomposing the sum, shifting the index of the first sum by 1, and simplifying results, we obtain

$$\Delta_K \mathbb{E}C^o(K) \geq F_D^{L_e}(K) - F_D^1(K+1) \geq F_D^{L_e}(K) - 1.$$

□

The inequality  $0 \leq K^*$  follows from the definition of the expediting level. To prove that  $K^* \leq \tilde{K}^*$  holds, it remains to be shown that  $\tilde{Z}(S^*(K), K) - Z(S^*(K), K)$  is decreasing in  $K$ .

The cost difference between  $Z(S^*(K), K)$  and  $\tilde{Z}(S^*(K), K)$  for a given expediting level  $K$  can be fully attributed to the difference in the expected expediting cost, because  $S^*(K)$  is independent of the expediting cost components. To prove that  $\tilde{Z}(S^*(K), K) - Z(S^*(K), K)$  is decreasing in  $K$ , we show that

$\Delta_K [\tilde{Z}(S^*(K), K) - Z(S^*(K), K)] = c_f[\Delta_K \mathbb{E}C^v - \Delta_K \mathbb{E}C^f] + c_b[\Delta_K \mathbb{E}C^v - \Delta_K \mathbb{E}C^b] + c_o[\Delta_K \mathbb{E}C^v - \Delta_K \mathbb{E}C^o]$  is negative.

The first term can be written as  $\Delta_K \mathbb{E}C^v - \Delta_K \mathbb{E}C^f = [F_D^{L_e}(K) - 1] + \sum_{k=0}^K f_D^{L_e-1}(k) f_D(K+1-k) = [F_D^{L_e}(K) - 1] + f_D^{L_e}(K+1) - f_D^{L_e-1}(K+1) f_D(0) \leq F_D^{L_e}(K+1) - 1$  and is negative. The second term can be written as  $\Delta_K \mathbb{E}C^v - \Delta_K \mathbb{E}C^b = [F_D^{L_e}(K) - 1] + \sum_{i=0}^{\infty} \sum_{k=0}^K f_D^{L_e-1}(k) f_D(K+1+i \cdot q - k) = [F_D^{L_e}(K) - 1] + \sum_{i=0}^{\infty} [f_D^{L_e}(K+1+i \cdot q) - \sum_{k=K+1}^{K+1+i \cdot q} f_D^{L_e-1}(k) f_D(K+1+i \cdot q - k)] \leq F_D^{L_e}(K) + \sum_{i=0}^{\infty} f_D^{L_e}(K+1+i \cdot q) - 1$  and is also negative. The third term can be written as  $\Delta_K \mathbb{E}C^v - \Delta_K \mathbb{E}C^o = [F_D^{L_e}(K) - 1] + \sum_{l=1}^{L_e} \Delta_K P(e_l = 0)$ . Using Lemma 1, we obtain  $\Delta_K \mathbb{E}C^v - \Delta_K \mathbb{E}C^o \leq [F_D^{L_e}(K) - 1] - [F_D^{L_e}(K) - 1] = 0$ , which completes the proof.  $\square$

## B. First and Second Order Finite Differences of the Objective Functions

In this section, we derive the first- and second-order finite differences of the simplified objective function

$$Z^s(S, K) = h\mathbb{E}I(S, K) + b\mathbb{E}B(S, K) + c_v\mathbb{E}C^v(K),$$

with the expected on-hand inventory level  $\mathbb{E}I(S, K) = \sum_{k=0}^S (S-k) f_O^{L_e, L_n}(k)$ , the expected backorder level,  $\mathbb{E}B(S, K) = \sum_{k=S}^{\infty} (k-S) f_O^{L_e, L_n}(k)$ , and the expected total number of expedited lead time periods  $\mathbb{E}C^v(K) = \sum_{l=1}^{L_e} \sum_{k=K}^{\infty} (k-K) f_{O^-}^l(k)$ . Then, we derive the first-order finite differences of the probability that units are expedited in a period,  $\mathbb{E}C^f(K) = [1 - F_{O^-}^{L_e}(K)]$ , the expected number of expediting batches,  $\mathbb{E}C^b(K) = \sum_{i=0}^{\infty} [1 - F_{O^-}^{L_e}(K+i \cdot q)]$ , and the expected number of orders from which units are expedited,  $\mathbb{E}C^o(K) = L_e - \sum_{l=1}^{L_e} [\sum_{m=0}^K \sum_{k=1}^m f_{O^-, O_l^-}^l(m, k) + \sum_{m=0}^{\infty} f_{O^-, O_l^-}^l(m, 0)]$ .

### First- and Second-Order Difference of $Z^s(S, K)$ w.r.t. $S$

The first-order finite difference of the expected on-hand inventory level,  $\mathbb{E}I(S, K)$ , with respect to the order-up-to level  $S$  is

$$\Delta_S \mathbb{E}I(S, K) = \sum_{k=0}^{S+1} (S+1-k) f_O^{L_e, L_n}(k) - \sum_{k=0}^S (S-k) f_O^{L_e, L_n}(k) = F_O^{L_e, L_n}(S).$$

The expected pipeline stock at the end of a period is  $\mathbb{E}P(K) = \sum_{k=0}^{\infty} k f_O^{L_e, L_n}(k)$ . Note that  $\mathbb{E}P(K)$  is independent of  $S$  and, thus,  $\Delta_S \mathbb{E}P(K) = 0$ . The first-order finite difference of the expected backorder level,  $\mathbb{E}B(S, K) = \mathbb{E}I(S, K) + \mathbb{E}P(K) - S$ , with respect to the order-up-to level  $S$  can be written as

$$\Delta_S \mathbb{E}B(S, K) = \Delta_S \mathbb{E}I(S, K) + \Delta_S \mathbb{E}P(K) - 1 = F_O^{L_e, L_n}(S) - 1.$$

The expected total number of expedited lead time periods,  $\mathbb{E}C^v(K)$ , is also independent of  $S$  and we obtain  $\Delta_S \mathbb{E}C^v(K) = 0$ . Thus, the first-order finite difference of our simplified objective function with respect to the order-up-to level  $S$  is

$$\Delta_S Z^s(S, K) = h\Delta_S \mathbb{E}I(S, K) + b\Delta_S \mathbb{E}B(S, K) + c_v\Delta_S \mathbb{E}C^v(K) = (b+h)F_O^{L_e, L_n}(S) - b,$$

and the second-order finite difference of our simplified objective function with respect to the order-up-to level  $S$  can be written as

$$\Delta_S^2 Z^s(S, K) = [(b+h)F_O^{L_e, L_n}(S) - b] - [(b+h)F_O^{L_e, L_n}(S-1) - b] = (b+h)f_O^{L_e, L_n}(S).$$

### First-Order Difference of $Z^s(S, K)$ w.r.t. $K$

From Equation (3), we obtain the first-order finite difference of the distribution of the number of units outstanding from the previous  $l$  orders after expediting,  $f_{O+}^l(\cdot)$ , with respect to the expediting level  $K$ ,

$$\Delta_K f_{O+}^l(k) = f_{O+}^{l, K+1}(k) - f_{O+}^{l, K}(k) = \begin{cases} F_D^l(K) - 1, & \text{for } k = K, \\ 1 - F_D^l(K), & \text{for } k = K + 1, \\ 0, & \text{else.} \end{cases} \quad (20)$$

Using Equation (20), the first-order finite difference of the distribution of the number of units outstanding from the previous  $l$  orders at the end of the period,  $f_O^l(\cdot)$ , with respect to the expediting level  $K$  can be written as

$$\Delta_K f_O^l(k) = \sum_{j=0}^k \Delta_K f_{O+}^l(j) f_D(k-j) = [F_D^l(K) - 1] [f_D(k-K) - f_D(k-(K+1))]. \quad (21)$$

From Equations (11) and (20), we obtain the first-order finite difference of the distribution of the number of units outstanding at the end of the period with expeditable lead time  $L_e$  and non-expeditable lead time  $L_n$ ,  $f_O^{L_e, L_n}(\cdot)$ , with respect to the expediting level  $K$ ,

$$\Delta_K f_O^{L_e, L_n}(k) = \sum_{j=0}^k \Delta_K f_{O+}^{L_e}(j) f_D^{L_n+1}(k-j) = [F_D^{L_e}(K) - 1] [f_D^{L_n+1}(k-K) - f_D^{L_n+1}(k-(K+1))]. \quad (22)$$

The first-order finite difference of the expected on-hand inventory level,  $\mathbb{E}I(S, K)$ , with respect to the expediting level  $K$  can be written as

$$\Delta_K \mathbb{E}I(S, K) = \sum_{k=0}^S (S-k) f_O^{L_e, L_n, K+1}(k) - \sum_{k=0}^S (S-k) f_O^{L_e, L_n, K}(k) = \sum_{k=0}^S (S-k) \Delta_K f_O^{L_e, L_n}(k).$$

Using  $\Delta_K f_O^{L_e, L_n}(k) = [F_D^{L_e}(K) - 1] [f_D^{L_n+1}(k-K) - f_D^{L_n+1}(k-(K+1))]$  from Equation (22) and rearranging terms results in

$$\Delta_K \mathbb{E}I(S, K) = [F_D^{L_e}(K) - 1] \left[ \sum_{k=K}^S (S-k) f_D^{L_n+1}(k-K) - \sum_{k=K+1}^S (S-k) f_D^{L_n+1}(k-(K+1)) \right].$$

We now shift the indices of the two sums by  $K$  and  $K+1$ , respectively, and obtain

$$\begin{aligned} \Delta_K \mathbb{E}I(S, K) &= [F_D^{L_e}(K) - 1] \left[ \sum_{k=0}^{S-K} (S-K-k) f_D^{L_n+1}(k) - \sum_{k=0}^{S-K-1} (S-K-1-k) f_D^{L_n+1}(k) \right] \\ &= [F_D^{L_e}(K) - 1] F_D^{L_n+1}(S-K-1). \end{aligned}$$

The first-order finite difference of the expected pipeline stock,  $\mathbb{E}P(K)$ , with respect to the expediting level  $K$  can be determined similarly and is  $\Delta_K \mathbb{E}P(K) = 1 - F_D^{L_e}(K)$ . The first-order finite difference of the expected backorder level,  $\mathbb{E}B(S, K) = \mathbb{E}I(S, K) + \mathbb{E}P(K) - S$ , with respect to the expediting level  $K$  can be written as

$$\Delta_K \mathbb{E}B(S, K) = \Delta_K \mathbb{E}I(S, K) + \Delta_K \mathbb{E}P(K) = [1 - F_D^{L_e}(K)] [1 - F_D^{L_n+1}(S-K-1)].$$

Using  $f_{O-}^l(k) = f_O^{l-1}(k)$  from Equation (5) and  $\Delta_K f_O^l(k) = [F_D^l(K) - 1] [f_D(k-K) - f_D(k-(K+1))]$  from Equation (21), the first-order finite difference of the expected total number of expedited lead time periods,  $\mathbb{E}C^v(K)$ , with respect to the expediting level  $K$  can be re-formulated as

$$\Delta_K \mathbb{E}C^v(K) = \sum_{l=1}^{L_e} \left[ \sum_{k=0}^K f_O^{l-1, K+1}(k) - 1 \right] + \sum_{l=1}^{L_e} [F_D^{l-1}(K) - 1] \left[ \sum_{k=1}^{\infty} k f_D(k) - \sum_{k=0}^{\infty} (k+1) f_D(k) \right].$$

For  $k \leq K < K + 1$ , we obtain  $f_{O^-}^{l-1, K+1}(k) = f_D^l(k)$  from Equation (3) and (4). This results in

$$\Delta_K \mathbb{E}C^v(K) = \sum_{l=1}^{L_e} F_D^l(K) - \sum_{l=1}^{L_e} F_D^{l-1}(K) = F_D^{L_e}(K) - 1.$$

Thus, the first-order finite difference of our simplified objective function with respect to the expediting level  $K$  can be written as

$$\begin{aligned} \Delta_K Z^s(S, K) &= h\Delta_K \mathbb{E}I(S, K) + b\Delta_K \mathbb{E}B(S, K) + c_v \Delta_K \mathbb{E}C^v(K) \\ &= [1 - F_D^{L_e}(K)] [b - c_v - (b + h)F_D^{L_n+1}(S - K - 1)]. \end{aligned}$$

### First- and Second-Order Difference of $Z^s(S, K)$ w.r.t. $S$ and $K$

The first-order finite difference of the expected on-hand inventory level,  $\mathbb{E}I(S, K)$ , with respect to the order-up-to level  $S$  and the expediting level  $K$  can be re-formulated as

$$\Delta_{S, K} \mathbb{E}I(S, K) = \sum_{k=0}^S \sum_{j=0}^k f_{O^+}^{L_e, K+1}(j) f_D^{L_n+1}(k-j) + \Delta_K \mathbb{E}I(S, K). \quad (23)$$

Since we already derived a simplified expression for  $\Delta_K \mathbb{E}I(S, K)$ , we now focus on the first term of Equation (23). Re-arranging the sums and shifting the index of the last sum results in

$$\sum_{k=0}^S \sum_{j=0}^k f_{O^+}^{L_e, K+1}(j) f_D^{L_n+1}(k-j) = \sum_{j=0}^{K+1} f_{O^+}^{L_e, K+1}(j) F_D^{L_n+1}(S-j).$$

For  $j < K + 1$ , we obtain  $f_{O^+}^{L_e, K+1}(j) = f_D^{L_e}(j)$  from Equation (3) and for  $j > K + 1$ , we have  $f_{O^+}^{L_e, K+1}(j) = 0$ .

This results in

$$\sum_{k=0}^S \sum_{j=0}^k f_{O^+}^{L_e, K+1}(j) f_D^{L_n+1}(k-j) = \sum_{j=0}^K f_D^{L_e}(j) F_D^{L_n+1}(S-j) + [1 - F_D^{L_e}(K)] F_D^{L_n+1}(S - K - 1),$$

for the first term of Equation (23). With  $\Delta_K \mathbb{E}I(S, K) = [F_D^{L_e}(K) - 1] F_D^{L_n+1}(S - K - 1)$  for the second term of Equation (23), we obtain

$$\Delta_{S, K} \mathbb{E}I(S, K) = \sum_{j=0}^K f_D^{L_e}(j) F_D^{L_n+1}(S-j).$$

The first-order finite difference of the expected pipeline stock,  $\mathbb{E}P(K)$ , with respect to  $S$  and  $K$  corresponds to the first-order finite difference of the expected pipeline stock,  $\mathbb{E}P(K)$ , with respect to  $K$ , because  $\mathbb{E}P(K)$  is independent of  $S$ . The first-order finite difference of the expected backorder level,  $\mathbb{E}B(S, K) = \mathbb{E}I(S, K) + \mathbb{E}P(K) - S$ , with respect to the order-up-to level  $S$  and the expediting level  $K$  can be written as

$$\Delta_{S, K} \mathbb{E}B(S, K) = \Delta_{S, K} \mathbb{E}I(S, K) + \Delta_K \mathbb{E}P(K) - 1 = \sum_{j=0}^K f_D^{L_e}(j) F_D^{L_n+1}(S-j) + [1 - F_D^{L_e}(K)] - 1.$$

Note that the expected total number of expedited lead time periods,  $\mathbb{E}C^v(K)$ , is independent of  $S$ . Thus, the first-order finite difference of our simplified objective function with respect to the order-up-to level  $S$  and the expediting level  $K$  is

$$\Delta_{S, K} Z^s(S, K) = h\Delta_{S, K} \mathbb{E}I(S, K) + b\Delta_{S, K} \mathbb{E}B(S, K) + c_v \Delta_K \mathbb{E}C^v(K)$$

$$= (b+h) \sum_{j=0}^K f_D^{L^e}(j) F_D^{L^n+1}(S-j) + (b-c_v) [1 - F_D^{L^e}(K)] - b,$$

and the second-order finite difference of our simplified objective function with respect to the order-up-to level  $S$  and the expediting level  $K$  can be written as

$$\begin{aligned} \Delta_{S,K}^2 Z^s(S,K) &= (b+h) \sum_{j=0}^K f_D^{L^e}(j) F_D^{L^n+1}(S-j) + (b-c_v) [1 - F_D^{L^e}(K)] - b \\ &\quad - (b+h) \sum_{j=0}^{K-1} f_D^{L^e}(j) F_D^{L^n+1}(S-1-j) - (b-c_v) [1 - F_D^{L^e}(K-1)] + b. \end{aligned}$$

This can be re-formulated as

$$\Delta_{S,K}^2 Z^s(S,K) = (b+h) \left[ \sum_{j=0}^{K-1} f_D^{L^e}(j) f_D^{L^n+1}(S-j) + f_D^{L^e}(K) F_D^{L^n+1}(S-K) \right] - (b-c_v) f_D^{L^e}(K).$$

### First-Order Differences of $\mathbb{E}C^f(K)$ , $\mathbb{E}C^b(K)$ and $\mathbb{E}C^o(K)$ w.r.t. $K$

Using  $f_{O^-}^l(k) = f_O^{l-1}(k)$  from Equation (5) and  $\Delta_K f_O^l(k) = [F_D^l(K) - 1] [f_D(k-K) - f_D(k-(K+1))]$  from Equation (21), the first-order finite difference of the probability that units are expedited in a period,  $\mathbb{E}C^f(K)$ , with respect to the expediting level  $K$  can be re-formulated as

$$\Delta_K \mathbb{E}C^f(K) = \sum_{k=0}^K - [F_D^{L^e-1}(K) - 1] [f_D(k-K) - f_D(k-(K+1))] - f_O^{L^e-1, K+1}(K+1).$$

Now, re-arranging the sums in the first term and using Equation (4) on the second term results in

$$\Delta_K \mathbb{E}C^f(K) = [1 - F_D^{L^e-1}(K)] f_D(0) - \sum_{k=0}^{K+1} f_{O^+}^{L^e-1, K+1}(k) f_D(K+1-k).$$

From Equation (3), we obtain  $f_{O^+}^{l, K+1}(K+1) = 1 - F_D^l(K)$  and, for  $k < K+1$ , we obtain  $f_{O^+}^{l, K+1}(k) = f_D^l(k)$ .

This results in

$$\Delta_K \mathbb{E}C^f(K) = - \sum_{k=0}^K f_D^{L^e-1}(k) f_D(K+1-k).$$

Using  $f_{O^-}^l(k) = f_O^{l-1}(k)$  from Equation (5) and  $\Delta_K f_O^l(k) = [F_D^l(K) - 1] [f_D(k-K) - f_D(k-(K+1))]$  from Equation (21), the first-order finite difference of the expected number of expediting batches,  $\mathbb{E}C^b(K)$ , with respect to the expediting level  $K$  can be written as

$$\Delta_K \mathbb{E}C^b(K) = \sum_{i=0}^{\infty} \left[ \sum_{k=0}^{K+i-q} - [F_D^{L^e-1}(K) - 1] [f_D(k-K) - f_D(k-(K+1))] - f_O^{L^e-1, K+1}(K+1+i \cdot q) \right].$$

Now, re-arranging the sums in the first term and using Equation (4) on the second term results in

$$\Delta_K \mathbb{E}C^b(K) = \sum_{i=0}^{\infty} \left[ [1 - F_D^{L^e-1}(K)] f_D(i \cdot q) - \sum_{k=0}^{K+1} f_{O^+}^{L^e-1, K+1}(k) f_D(K+1+i \cdot q - k) \right].$$

From Equation (3), we obtain  $f_{O^+}^{l, K+1}(K+1) = 1 - F_D^l(K)$  and, for  $k < K+1$ , we obtain  $f_{O^+}^{l, K+1}(k) = f_D^l(k)$ .

This results in

$$\Delta_K \mathbb{E}C^b(K) = - \sum_{i=0}^{\infty} \sum_{k=0}^K f_D^{L^e-1}(k) f_D(K+1+i \cdot q - k).$$

Before we analyze the finite differences of the expected number of orders from which units are expedited,  $\mathbb{E}C^o(K) = L_e - \sum_{l=1}^{L_e} P(e_l = 0)$ , we simplify the term  $P(e_l = 0)$ , the probability that no units from the order placed  $l$  periods before are expedited. For  $l \geq 3$ , we obtain

$$P(e_l = 0) = \sum_{m=0}^K \sum_{k=1}^m f_{O^-, O_l^-}^l(m, k) + \sum_{m=0}^{\infty} f_{O^-, O_l^-}^l(m, 0).$$

Using  $f_{O^-, O_l^-}^l(m, k) = \sum_{n=0}^{m-k} f_{O^+, O_{l-1}^+}^{l-1}(m-n, k) f_D(n)$  from Equation (9) and (10), and with  $f_{O^+, O_{l-1}^+}^{l-1}(m, k) = f_{O_{l-1}^+}^+(k) \left| \sum_{i=1}^{l-2} O_{t,i}^+ = m-k \right| f_{O^+}^{l-2}(m-k)$  from Equation (8), we obtain

$$P(e_l = 0) = \sum_{n=0}^{\infty} \sum_{m=0}^{K-n} \sum_{k=1}^m f_{O_{l-1}^+}^+(k) \left| \sum_{i=1}^{l-2} O_{t,i}^+ = m-k \right| f_{O^+}^{l-2}(m-k) f_D(n) \\ + \sum_{m=0}^K f_{O_{l-1}^+}^+(0) \left| \sum_{i=1}^{l-2} O_{t,i}^+ = m \right| f_{O^+}^{l-2}(m).$$

With Equations (3) and (7) and, in particular, with  $f_{O^+}^{l-2}(m-k) = f_D^{l-2}(m-k)$  for  $m-k < m \leq K$  for  $k \geq 1$ , we obtain

$$P(e_l = 0) = \sum_{n=0}^{\infty} \sum_{m=0}^{K-n} \sum_{k=1}^m f_D(k) f_D^{l-2}(m-k) f_D(n) + \sum_{k=1}^K [1 - F_D(k)] f_D^{l-2}(K-k) f_D(0) \\ + \sum_{m=0}^{K-1} f_D(0) f_D^{l-2}(m) + 1 - F_D^{l-2}(K-1),$$

which can be simplified to

$$P(e_l = 0) = F_D^l(K) - 2f_D(0)F_D^{l-1}(K) - [1 - 2f_D(0)]F_D^{l-2}(K-1) + f_D(0)f_D(0)f_D^{l-2}(K) + 1. \quad (24)$$

Along the same line of arguments as above, we obtain for  $l = 2$

$$P(e_2 = 0) = \begin{cases} F_D^2(K) + 2[1 - F_D^1(K)]f_D(0), & \text{for } K > 0, \\ 1, & \text{for } K = 0, \end{cases}$$

and for  $l = 1$ , we obtain  $P(e_1 = 0) = F_D^1(K)$ . The expected number of orders from which units are expedited,  $\mathbb{E}C^o(K)$ , with respect to the expediting level  $K$  can be re-formulated as

$$\Delta_K \mathbb{E}C^o(K) = L_e - L_e - \sum_{l=1}^{L_e} P(e_l^{K+1} = 0) + \sum_{l=1}^{L_e} P(e_l^K = 0) = - \sum_{l=1}^{L_e} \Delta_K P(e_l = 0),$$

which depends on  $\Delta_K P(e_l = 0)$ , the probability that no units from the order placed  $l$  periods before are expedited,  $P(e_l = 0)$ , with respect to the expediting level  $K$ . Using Equation (24), we obtain for  $l \geq 3$

$$\Delta_K P(e_l = 0) = f_D^l(K+1) - f_D(0)f_D^{l-1}(K+1) - f_D(0) [f_D^{l-1}(K+1) - f_D(0)f_D^{l-2}(K+1)] \\ - [1 - f_D(0)][1 - f_D(0)]f_D^{l-2}(K),$$

and for  $l = 2$ , we obtain

$$\Delta_K P(e_2 = 0) = \begin{cases} f_D^2(K+1) - 2f_D(0)f_D^1(K+1), & \text{for } K > 0, \\ -[1 - F_D^1(K)][1 - F_D^1(K)], & \text{for } K = 0, \end{cases}$$

and for  $l = 1$ , we obtain  $\Delta_K P(e_1 = 0) = f_D^1(K+1)$ .
